# Supplementary material
Source: PubMed Central journal article supplement (PMC4917433)
Supplement: NIHMS789398-supplement-Supplement.pdf [file NIHMS789398-supplement-Supplement.pdf]

**Supplemental Information**

**FOXN3 regulates hepatic glucose utilization**

**Santhosh Karanth, Erin K. Zinkhan, Jonathon T. Hill, H. Joseph Yost, Amnon Schlegel**

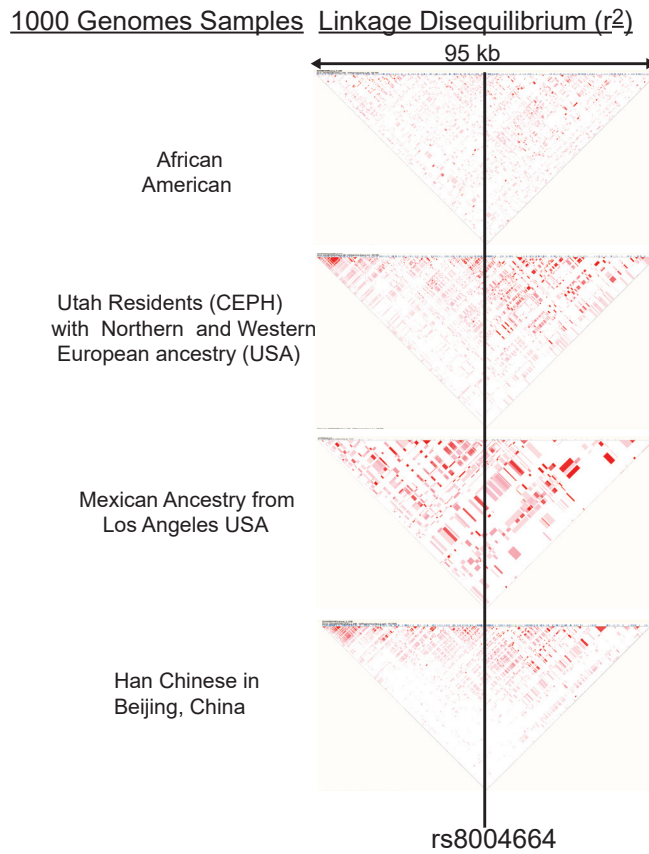

**Figure S1. Architecture and population genetics of the rs8004664 SNP in the *FOXN3* gene, Related to Figure 1.** Linkage disequilibrium ( $r^2$  values) plots for the 100 kb flanking the rs8004664 are shown for four populations that contributed to the 1000 Genomes project (rendered on the ENSEMBL browser). In none of these populations is this allele in obvious, strong linkage disequilibrium with distant surrounding SNPs, pointing to this intronic region as the causal site.

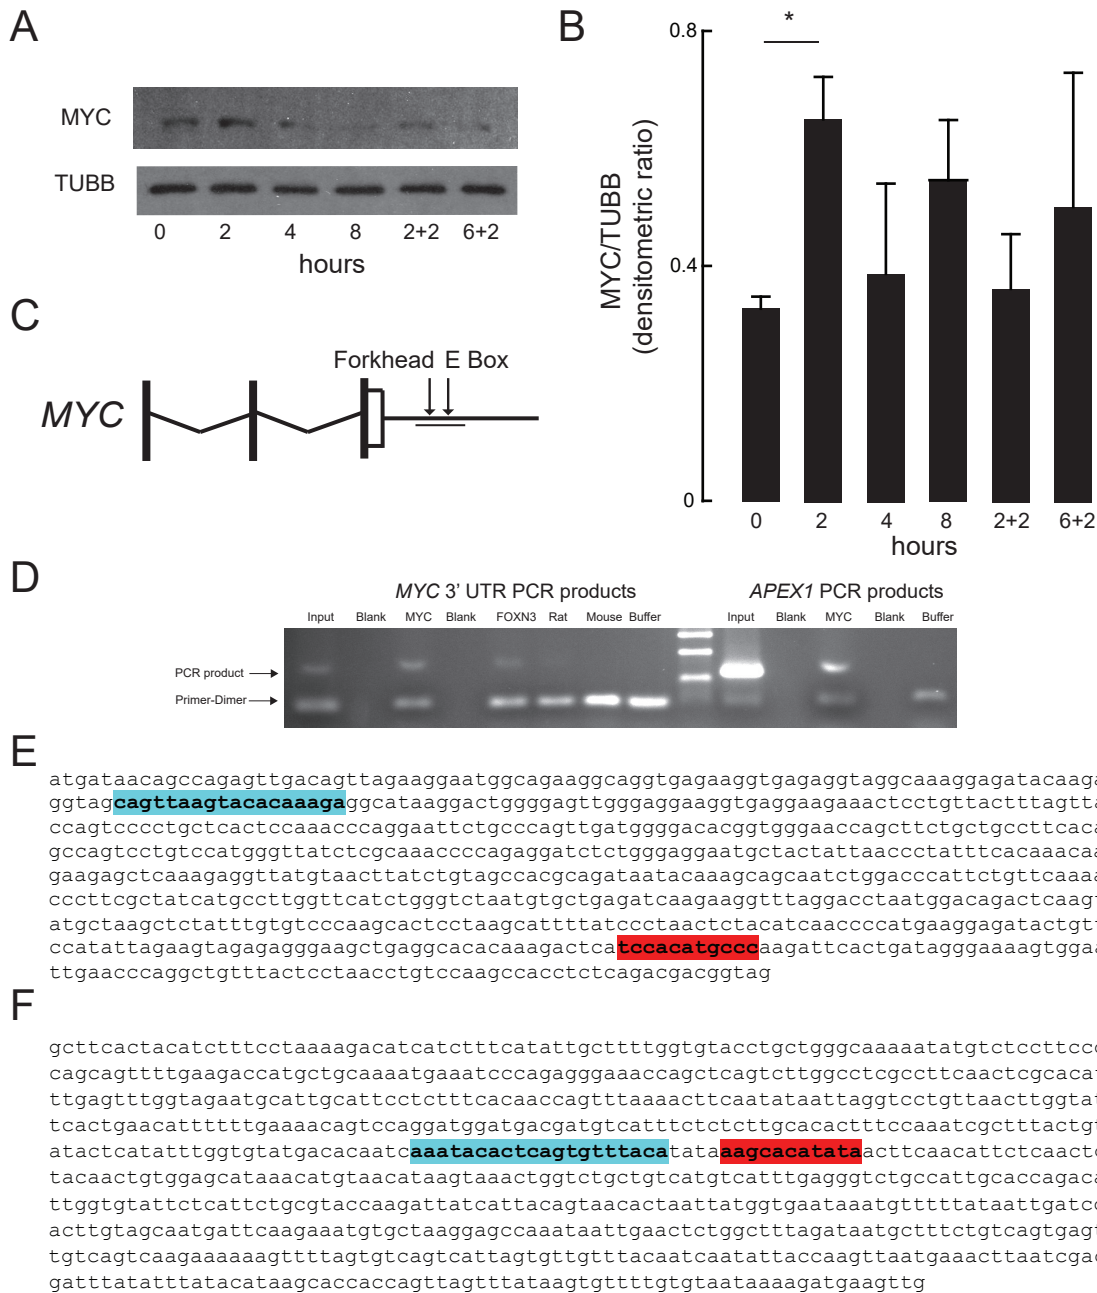

**Figure S2. FOXN3 binds a Forkhead sequence in the 3'-UTR of MYC, Related to Figure 4.** (A,B) Immunoblot and densitometric analysis was performed for human MYC for the samples shown in Figure 2B (the TUBB immunoblot is reproduced here for clarity). Where indicated, samples were returned to complete medium for the indicated time ('+'). All times are in hours. Mean  $\pm$  s.e.m. values are shown. \* $P = 0.05$  in a 2-sided Student's  $t$ -test. (C) Structure of the human MYC gene (~5 kb shown). A Forkhead binding site and a MYC binding site (E box) are located distal to the 3'-untranslated region (3'UTR) were identified using the ENCODE database. The target PCR product for the ChIP assay is underlined. (D) The gel shows a PCR products from DNA templates precipitated from chromatin extracted from HepG2 cells with the indicated antibodies (MYC or FOXN3), antisera (Rat and Mouse) or controls (input and buffer). As a positive control, ChIP was performed on an additional MYC target gene APEX1. (E) Human MYC sequences distal to the 3'-UTR where the Forkhead binding site (blue) and E-box (red) were identified in the ENCODE database. (F) Zebrafish *mycb* sequences distal to the 3'-UTR where the Forkhead binding site (blue) and E-box (red) were identified with JASPAR modeling and then validated in Figure 4.

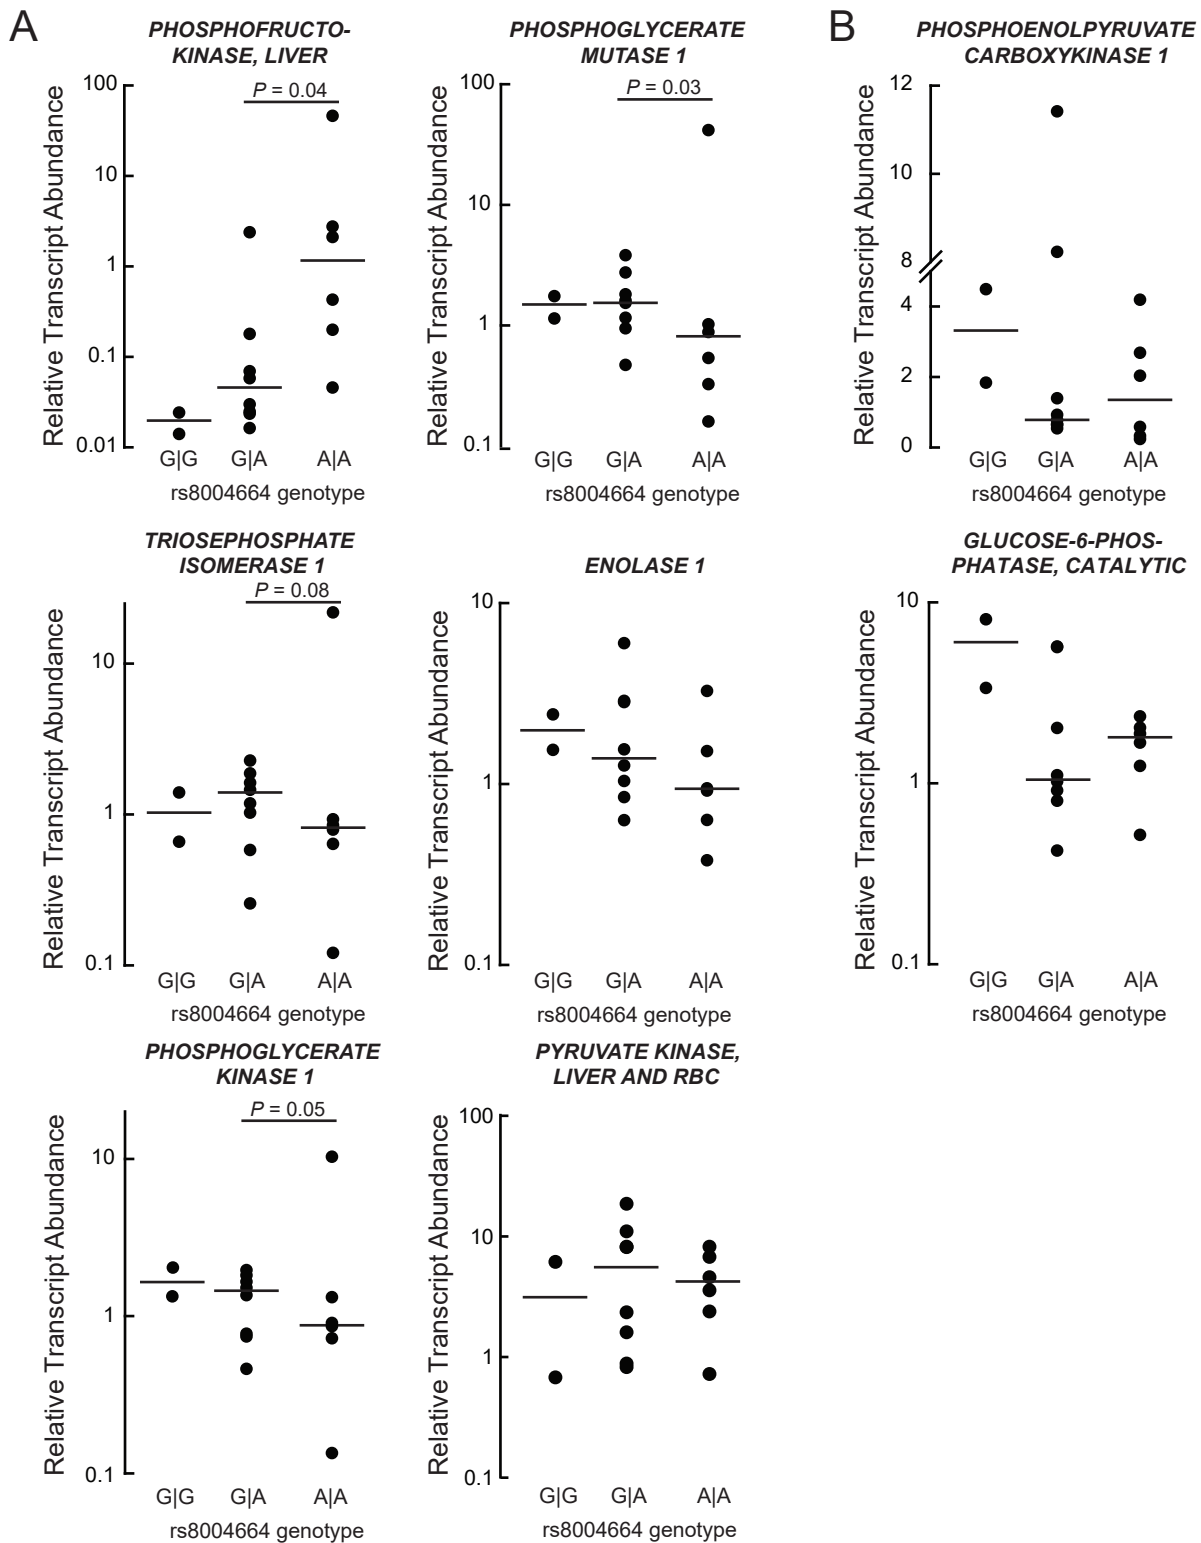

**Figure S3. Glycolytic and gluconeogenic gene transcript abundance in the primary human hepatocytes samples, Related to Figure 5.** Steady-state transcript abundance of the indicated glycolytic (A) and gluconeogenic (B) transcripts in cryopreserved human hepatocytes from donors with the indicated rs8004664 genotypes, G|G (n=2), A|G (n=8), and A|A (n=6). Horizontal lines indicate the median value. For *PHOSPHOGLYCERATE KINASE 1*, a 1-tailed Student's *t*-test and an outlier test were performed. For *PHOSPHOGLYCERATE MUTASE 1*, a 2-tailed Student's *t*-test and an outlier test were performed. For *TRIOSEPHOSPHATE ISOMERASE*, a 2-tailed Student's *t*-test and an outlier test were performed. For *PHOSPHOFRUCTOKINASE, LIVER*, a 2-tailed Student's *t*-test and an outlier test were performed.

**Table S1. Phenotypic characterization of the 16 human hepatocyte samples studied, Related to Figures 1 and 4.**

| Lot Number  | Age (years) | Sex    | Body mass index (kg/m <sup>2</sup> ) | rs8004664 genotype | Transcript abundance (normalized to <i>GAPDH</i> ) |                   |            |
|-------------|-------------|--------|--------------------------------------|--------------------|----------------------------------------------------|-------------------|------------|
|             |             |        |                                      |                    | <i>FOXN3-T003</i>                                  | <i>FOXN3-T004</i> | <i>MYC</i> |
| ZBH1665     | 15          | Male   | 17.6                                 | G G                | 0.015                                              | 0.518             | 8.697      |
| ZBH2347-P10 | 1.4         | Female | 19.2                                 | G G                | 0.046                                              | 0.787             | 4.654      |
|             |             |        |                                      |                    |                                                    |                   |            |
| ZBH0614     | 54          | Male   | 25.8                                 | G A                | 0.246                                              | 0.250             | 2.485      |
| ZBH0129     | 51          | Male   | 36.6                                 | G A                | 0.046                                              | 0.421             | 3.055      |
| HUM4058     | 67          | Female | 28                                   | G A                | 1.271                                              | 0.808             | 2.101      |
| ZBH0486     | 14          | Female | 20.7                                 | G A                | 0.046                                              | 0.617             | 7.987      |
| HUM4035     | 51          | Female | 33                                   | G A                | 1.278                                              | 0.247             | 2.271      |
| ZBH1835 U10 | 17          | Female | 23.5                                 | G A                | 0.068                                              | 0.318             | 12.831     |
| ZBH012513   | 51          | Female | 33.5                                 | G A                | 0.267                                              | 0.901             | 15.504     |
| HUM4060B    | 23          | Male   | 18                                   | G A                | 0.978                                              | 0.434             | 94.252     |
|             |             |        |                                      |                    |                                                    |                   |            |
| HUM4024     | 77          | Male   | 26                                   | A A                | 0.715                                              | 0.901             | 1.003      |
| HUM4069C    | 30          | Male   | 25                                   | A A                | 0.652                                              | 0.455             | 0.668      |
| ZBH1989-P   | 25          | Female | 26.1                                 | A A                | 1.041                                              | 0.371             | 4.660      |
| HUM4031     | 53          | Female | 27                                   | A A                | 0.842                                              | 0.742             | 1.377      |
| HUM4048     | 43          | Female | 23                                   | A A                | 1.729                                              | 23.637            | 0.369      |
| HUM4050     | 42          | Female | 29.1                                 | A A                | 1.358                                              | 0.362             | 0.622      |

**Table S2. Primer sequences, Related to Figures 1, 2, and 4.**

| <b>Primers for quantitative PCR</b>                  |                          |                                                      |                            |
|------------------------------------------------------|--------------------------|------------------------------------------------------|----------------------------|
| <b>Gene</b>                                          | <b>Forward primer</b>    | <b>Reverse Primer</b>                                | <b>Reference</b>           |
| Zebrafish                                            |                          |                                                      |                            |
| <i>aldoaa</i>                                        | CTGCCAGGAGGAGTTCATAAAG   | CCTTATCTCCCCGAGGACACATA                              |                            |
| <i>ef1a</i>                                          | TTGAGAAGAAAATCGGTGGTGCTG | GGAACGGTGTGATTGAGGGAAATTC                            | (Karanth et al., 2009)     |
| <i>eno1a</i>                                         | CTTCATCGCTGACCTTGTAGTC   | TCAGTGCTTCAGATGGGTTTC                                |                            |
| <i>gck</i>                                           | TGCCAGGAGGAGCTAAAGA      | CTGCCTTCTTCTGACTGGATAAA                              |                            |
| <i>gludb1</i>                                        | CAACGGAGAATGGGAGGTTATC   | AACCTCATCCACAGACACATC                                |                            |
| <i>foxn3_T002</i>                                    | GTGACGACGAGGAGATGAAAG    | CGTCCGGTTGGTGATATTGT                                 |                            |
| <i>foxn3_T201</i>                                    | GCTACCTGTCTCTGTCTGATT    | CTCCTTCGCCTTTGTTGTTT                                 |                            |
| <i>myca</i>                                          | TCCTGGACACTCCACCTAAC     | CTCTTCTTCCTCCTCCTCTTCT                               |                            |
| <i>mycb</i>                                          | CCACAACACTTCCACTGGATAC   | CCACGTCAATTTCTCCTCCTC                                |                            |
| <i>pck1</i>                                          | GCTGCTGAACACAAAGGTAAG    | CTGACCGAAGTTATAGCCGAAG                               |                            |
| <i>pfklb</i>                                         | CACAGACTTTGAGCACAGGA     | TCGTGCGAACTGGTCTGATATTT                              |                            |
| <i>pgam1b</i>                                        | AAACACCTGGAGGGAATGTC     | CATAGGCTTCACTGGCTTCA                                 |                            |
| <i>pgk1</i>                                          | AAATGGCTGCATCACCATTATC   | CTCTGGCAGAAGAGCCTTAAA                                |                            |
| <i>slc2a2</i>                                        | CCACGTCCAGCAGCTATT       | GCTTCCACAGAGACTCACTAAA                               |                            |
| <i>tpi1a</i>                                         | ACTCTGTGCGCATCATCTAC     | TTTCAGAGCGTCTGGTTGAG                                 |                            |
| Human                                                |                          |                                                      |                            |
| ALDOA                                                | GTTGTGGGCATCAAGGTAGA     | GCTCCGTCCTTCTTGTACTG                                 |                            |
| APEX1                                                | ACGAACAACCCAGAACCAAG     | CTAAGCCAGAGACCCTCACG                                 | (Barrilleaux et al., 2013) |
| ENO1                                                 | TGCCCTGGTTAGCAAGAAAC     | GCGTTCCGACCAAACCTTAGA                                |                            |
| FOXN3 T003                                           | CAGGCATATCAAAGCACATCAG   | AATGTCAGGATCTTGGAGAAG                                |                            |
| FOXN3 T004                                           | CCTTCTCCAAGTTCCTCCAGGA   | ACAAGATGGCTCACTCTCAGTC                               |                            |
| GAPDH                                                | TGCACCACCAACTGCTTAGC     | GGCATGGACTGTGGTCATGAG                                | (Cicinnati et al., 2008)   |
| GCK1 M1                                              | GCGGAGAAGCCTTGGATATT     | ATCTGCTCTACCTTCTCCTTCT                               |                            |
| G6PC                                                 | GGCTCAACCTCGTCTTTAAGTG   | CTCCCTGGTCCAGTCTCACA                                 | (Zhang et al., 2014)       |
| HMBS                                                 | TGCAACGGCGGAAGAAAA       | ACGAGGCTTTCAATGTTGCC                                 | (Cicinnati et al., 2008)   |
| PCK1                                                 | ACGGATTACCCCTACGTGGT     | CCCCACAGAATGGAGGCATTT                                | (Zhang et al., 2014)       |
| PFKL                                                 | AAGGCATGAACGCTGCT        | CCCTCATAGCCCTCGTAGAT                                 |                            |
| PGAM1                                                | CATCTGGAGGGTCTCTTGAA     | AACTGCATGGGCTTGATAGG                                 |                            |
| PGK1                                                 | CTGGACAAGCTGGACGTTAAA    | TTGGGACAGCAGCCTTAATC                                 |                            |
| PKLR                                                 | GGCATTGAAAGTGAAAGCTC     | CCCAGCATGATGTTGGTGTA                                 |                            |
| TPI                                                  | AAGATGAACGGGCGGAAG       | GCGAAGTCGATATAGGCAGTAG                               |                            |
| <b>Primers for genotyping SNP rs8004664</b>          |                          |                                                      |                            |
| <b>Forward primer</b>                                |                          | <b>Reverse Primer</b>                                |                            |
| GGTCTTTGCACAGGCTCT                                   |                          | ACATTATGCTAGTTGTTGGGTTATG                            |                            |
| <b>Primers for Transgenesis</b>                      |                          |                                                      |                            |
| Gateway multisite cloning - middle Entry clone (pME) | <b>Primers</b>           |                                                      |                            |
| zebrafish <i>foxn3</i>                               | <i>attB1</i>             | GGGGACAAGTTTGTACAAAAAAGCAGGCTACTGTGGTCACTGCTGAA      |                            |
|                                                      | <i>attB2</i>             | GGGGACCACTTTGTACAAAGAAAGCTGGGTCTTTTGTCTTTCTGCCCTT    |                            |
| Human <i>FOXN3</i>                                   | <i>attB1</i>             | GGGGACAAGTTTGTACAAAAAAGCAGGATGGGTCCAGTCATGCCTCCAGT   |                            |
|                                                      | <i>attB2</i>             | GGGGACCACTTTGTACAAAGAAAGCTGGGTATTTTTTGTGGTTTCCTTTTGC |                            |
| <b>Chromatin Immunoprecipitation-DNA primers</b>     |                          |                                                      |                            |
|                                                      | <b>Forward primer</b>    | <b>Reverse Primer</b>                                |                            |
| Forkhead binding sites near <i>MYC</i> 3'UTR         | CAGCCAGAGTTGACAGTTAG     | TTGTGAAGGCAGCAGAAG                                   |                            |
| Forkhead binding sites near <i>mycb</i> 3'UTR        | AGGTCCTGTTAACTTGGTATCAC  | TGACAGCAGACCAGTTTACTTAT                              |                            |

## Supplementary References

Cicinnati, V.R., Shen, Q., Sotiropoulos, G.C., Radtke, A., Gerken, G., and Beckebaum, S. (2008). Validation of putative reference genes for gene expression studies in human hepatocellular carcinoma using real-time quantitative RT-PCR. *BMC Cancer* 8, 350.

Karanth, S., Lall, S., Denovan-Wright, E., and Wright, J. (2009). Differential transcriptional modulation of duplicated fatty acid-binding protein genes by dietary fatty acids in zebrafish (*Danio rerio*): evidence for subfunctionalization or neofunctionalization of duplicated genes. *BMC Evol Biol* 9, 219.

Zhang, P., Tu, B., Wang, H., Cao, Z., Tang, M., Zhang, C., Gu, B., Li, Z., Wang, L., Yang, Y., *et al.* (2014). Tumor suppressor p53 cooperates with SIRT6 to regulate gluconeogenesis by promoting FoxO1 nuclear exclusion. *Proc Natl Acad Sci USA* 111, 10684-10689.
